# Supplementary material
Source: PubMed Central journal article supplement (PMC6286089)
Supplement: NIHMS987077-supplement-1.pdf [file NIHMS987077-supplement-1.pdf]

**APPENDIX**

**Exhibit A1. Characteristics of enrollees in Medicare Advantage and Traditional Medicare**

| Characteristics                          | 2007               |                      | 2013               |                      |
|------------------------------------------|--------------------|----------------------|--------------------|----------------------|
|                                          | Medicare Advantage | Traditional Medicare | Medicare Advantage | Traditional Medicare |
| N                                        | 6,961,817          | 29,708,707           | 12,235,820         | 30,742,869           |
| Mean Age, y                              | 75.0               | 75.2                 | 74.6               | 74.7                 |
| Female, %                                | 58.1               | 57.3                 | 57.3               | 55.6                 |
| Race/Ethnicity, %                        |                    |                      |                    |                      |
| White                                    | 82.7               | 86.0                 | 81.5               | 84.6                 |
| Black                                    | 9.8                | 7.9                  | 10.0               | 7.9                  |
| Hispanic                                 | 3.4                | 2.0                  | 3.1                | 2.0                  |
| Other                                    | 2.3                | 2.1                  | 3.0                | 3.2                  |
| Full Medicaid coverage, %                | 8.0                | 11.8                 | 8.4                | 11.0                 |
| Partial Medicaid coverage, %             | 5.1                | 4.0                  | 5.5                | 3.6                  |
| Mean ZIP Code-level household Income, \$ | 53,991             | 53,628               | 53,759             | 55,720               |

**SOURCE** Authors' analysis of 2007 and 2013 Medicare Beneficiary Summary File.

**Exhibit A2. Characteristics of skilled nursing facility (SNF) care users in Medicare Advantage and Traditional Medicare, 2013**

| Characteristics                          | Beneficiaries with full Medicaid benefit <sup>a</sup> |                      | Beneficiaries without full Medicaid benefit <sup>a</sup> |                      | Total Population   |                      |
|------------------------------------------|-------------------------------------------------------|----------------------|----------------------------------------------------------|----------------------|--------------------|----------------------|
|                                          | Medicare Advantage                                    | Traditional Medicare | Medicare Advantage                                       | Traditional Medicare | Medicare Advantage | Traditional Medicare |
| N                                        | 163,059                                               | 748,678              | 497,522                                                  | 1,383,379            | 660,581            | 2,132,057            |
| Mean age, y                              | 81.7                                                  | 81.9                 | 80.4                                                     | 81.5                 | 80.7               | 81.7                 |
| Female, %                                | 71.8                                                  | 71.5                 | 62.3                                                     | 62.2                 | 64.6               | 65.4                 |
| Race/Ethnicity, %                        |                                                       |                      |                                                          |                      |                    |                      |
| White                                    | 73.7                                                  | 75.2                 | 87.5                                                     | 91.4                 | 84.1               | 85.7                 |
| Black                                    | 17.3                                                  | 16.1                 | 8.8                                                      | 6.3                  | 10.9               | 9.8                  |
| Hispanic                                 | 4.4                                                   | 3.7                  | 1.4                                                      | 0.6                  | 2.1                | 1.7                  |
| Other                                    | 1.9                                                   | 2.1                  | 1.4                                                      | 1.1                  | 1.5                | 1.5                  |
| Mean ZIP code-level household income, \$ | 52,357                                                | 50,674               | 55,173                                                   | 57,243               | 54,478             | 54,936               |
| Mean activities of daily living score    | 17.7                                                  | 17.7                 | 16.5                                                     | 16.5                 | 16.8               | 16.9                 |
| Mean cognitive function scale            | 2.2                                                   | 2.3                  | 1.6                                                      | 1.7                  | 1.8                | 1.9                  |

**SOURCE** Authors' analysis of 2013 Minimum Data Set and Medicare Beneficiary Summary File. **NOTES**

<sup>a</sup>Stratified analyses for beneficiaries with and without full Medicaid benefits.

**Exhibit A3. Unadjusted trends in the use of home health care, skilled nursing facility, and hospital care for Medicare Advantage and Traditional Medicare enrollees**

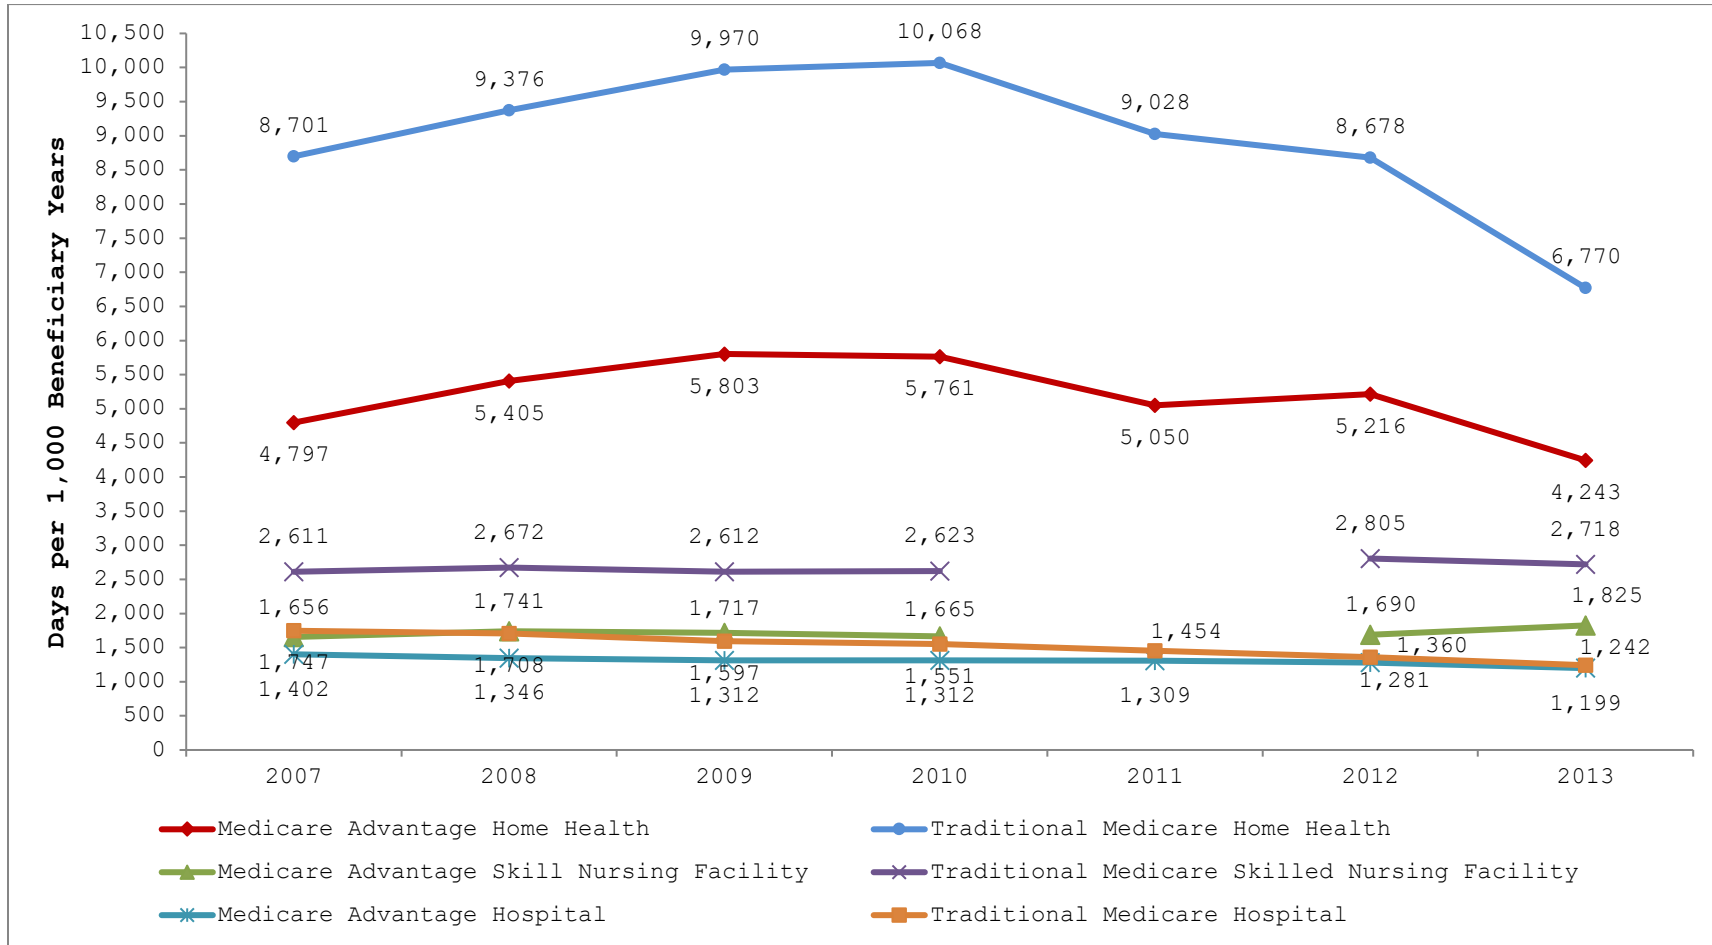

**SOURCE** Authors' analysis of 2007-2013 Outcome and Assessment Information Set (OASIS), Minimum Data Set (MDS), Medicare Healthcare Effectiveness & Data Information Set (HEDIS), Medicare claims data and Medicare Beneficiary Summary File (MBSF). **NOTES** We excluded 2011 data for SNF days/1,000, as the transition between MDS 2.0 and MDS 3.0 occurred in that calendar year.

**Exhibit A4. Unadjusted Variation in Use of Home Health, Skilled Nursing Facility (SNF), and Hospital Care across Hospital Referral Regions (HRRs) in Medicare Advantage and Traditional Medicare (2013)**

| Measures                                                                | Medicare Advantage |                                               | Traditional Medicare |                                               |
|-------------------------------------------------------------------------|--------------------|-----------------------------------------------|----------------------|-----------------------------------------------|
|                                                                         | Ratio <sup>a</sup> | Absolute difference between HRRs <sup>a</sup> | Ratio <sup>a</sup>   | Absolute difference between HRRs <sup>a</sup> |
| <b>Home health care</b>                                                 |                    |                                               |                      |                                               |
| 90 <sup>th</sup> to 10 <sup>th</sup> percentile comparison <sup>b</sup> | 3.88               | 6,403                                         | 4.11                 | 9,214                                         |
| Interquartile comparison <sup>c</sup>                                   | 2.06               | 3,052                                         | 2.22                 | 4,781                                         |
| <b>Skilled nursing facility care</b>                                    |                    |                                               |                      |                                               |
| 90 <sup>th</sup> to 10 <sup>th</sup> percentile comparison <sup>b</sup> | 2.30               | 1,466                                         | 2.06                 | 1,861                                         |
| Interquartile comparison <sup>c</sup>                                   | 1.62               | 903                                           | 1.39                 | 896                                           |
| <b>Hospital care</b>                                                    |                    |                                               |                      |                                               |
| 90 <sup>th</sup> to 10 <sup>th</sup> percentile comparison <sup>b</sup> | 1.91               | 742                                           | 1.77                 | 676                                           |
| Interquartile comparison <sup>c</sup>                                   | 1.38               | 380                                           | 1.35                 | 367                                           |

**SOURCE** Authors' analysis of data for 2013 from the Outcome and Assessment Information Set, Minimum Data Set, Healthcare Effectiveness and Data Information Set, Medicare claims, and the Medicare Beneficiary Summary File. **NOTES** <sup>a</sup>Days per 1,000 beneficiary-years between HRRs with higher and lower utilization. <sup>b</sup>Utilization in the HRR at the ninetieth percentile, divided by utilization in the HRR at the tenth percentile. <sup>c</sup>Utilization in the HRR at the seventy-fifth percentile, divided by utilization in the HRR at the twenty-fifth percentile.

**Exhibit A5. Geographic variation in use of home health, skilled nursing facility (SNF), and hospital care between Medicare Advantage and Traditional Medicare, excluding HRRs with less than 5,000 MA beneficiaries, 2013**

| <b>Measures</b>                                     | <b>Medicare Advantage</b> | <b>Traditional Medicare</b> |
|-----------------------------------------------------|---------------------------|-----------------------------|
| <b>Home Health Days per 1,000 beneficiary-years</b> |                           |                             |
| 90th/10th Percentile Ratio                          | 3.77                      | 3.96                        |
| Interquartile Ratio                                 | 1.95                      | 2.07                        |
| <b>SNF Days per 1,000 beneficiary-years</b>         |                           |                             |
| 90th/10th Percentile Ratio                          | 2.53                      | 1.90                        |
| Interquartile Ratio                                 | 1.50                      | 1.39                        |
| <b>Hospital Days per 1,000 beneficiary-years</b>    |                           |                             |
| 90th/10th Percentile Ratio                          | 2.13                      | 1.72                        |
| Interquartile Ratio                                 | 1.42                      | 1.34                        |

**SOURCE** Authors' analysis of 2013 Outcome and Assessment Information Set (OASIS), Minimum Data Set (MDS), Medicare Healthcare Effectiveness & Data Information Set (HEDIS), Medicare claims data and Medicare Beneficiary Summary File (MBSF). **NOTES** Two measures of geographic variation were calculated: the 90th/10th percentile ratio, which is the 90th percentile value divided by the 10th percentile value; and the interquartile ratio, which is the 75th percentile value divided by the 25th percentile value.

**Exhibit A6. Use of home health, skilled nursing facility (SNF), and hospital care in Medicare Advantage and Traditional Medicare at the hospital referral region level, 2013**

**Panel A: Home Health Days/1000**

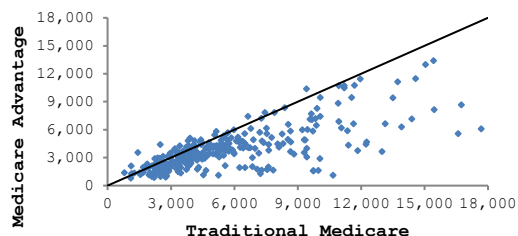

**Panel B: SNF Days/1000**

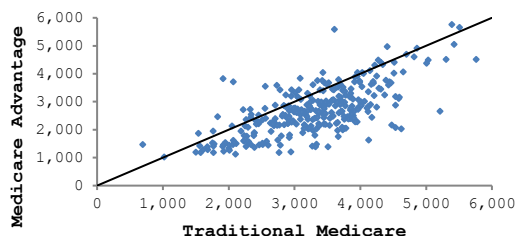

**Panel C: Hospital Days/1000**

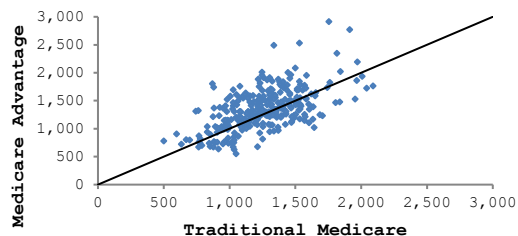

**SOURCE** Authors' analysis of 2013 Outcome and Assessment Information Set (OASIS), Minimum Data Set (MDS), Medicare Healthcare Effectiveness & Data Information Set (HEDIS), Medicare claims data and Medicare Beneficiary Summary File (MBSF). **NOTES** Each point refers to one of 306 hospital referral regions (HRR) in the US. Estimates adjusted for age, gender, race or ethnic group (black, white, Hispanic, Asian, or other), ZIP Code-level income derived from national Census data, and dual eligibility for Medicaid (defined in the first month of Medicare eligibility of the measurement year). Diagonal line represents a line of equivalent utilization in traditional Medicare and Medicare Advantage. Therefore, points above the line indicate HRRs with greater utilization in Medicare Advantage and points below indicate HRRs with lower utilization in Medicare Advantage.

**Exhibit A7. Correlations of the use of home health, skilled nursing facility (SNF), and hospital care between Medicare Advantage and Traditional Medicare at the hospital referral region (HRR) Level (excluding HRRs with less than 5,000 MA beneficiaries), 2013**

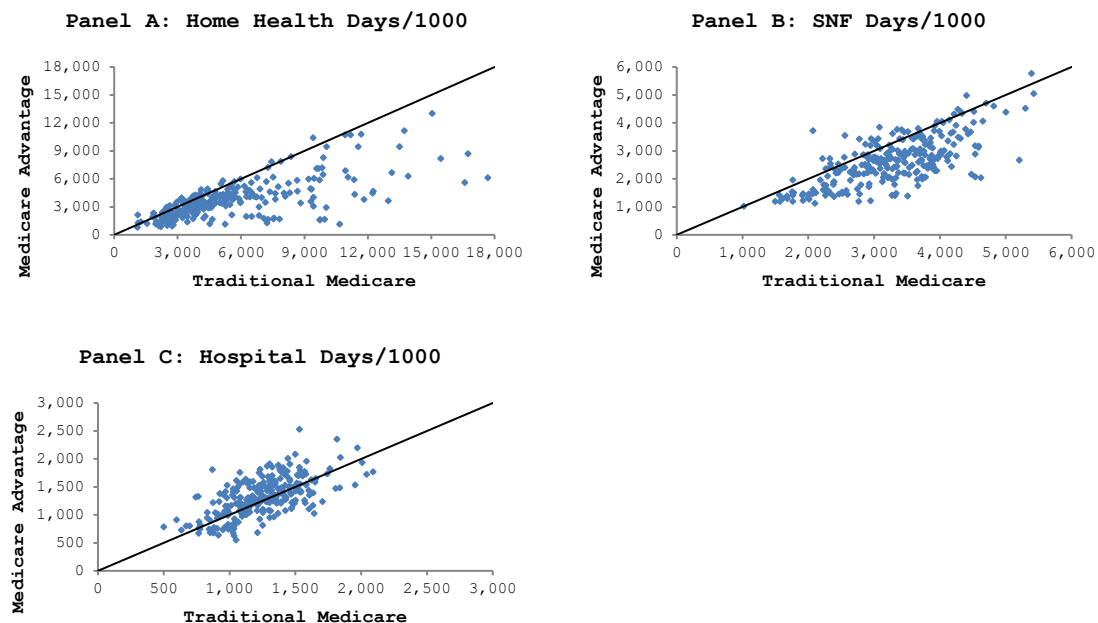

**SOURCE** Authors' analysis of 2013 Outcome and Assessment Information Set (OASIS), Minimum Data Set (MDS), Medicare Healthcare Effectiveness & Data Information Set (HEDIS), Medicare claims data and Medicare Beneficiary Summary File (MBSF). **NOTES** Each point refers to one of 306 hospital referral regions (HRR) in the US. Estimates adjusted for age, gender, race or ethnic group (black, white, Hispanic, Asian, or other), ZIP Code-level income derived from national Census data, and dual eligibility for Medicaid (defined in the first month of Medicare eligibility of the measurement year). Diagonal line represents a line of equivalent utilization in traditional Medicare and Medicare Advantage. Therefore, points above the line indicate HRRs with greater utilization in Medicare Advantage and points below indicate HRRs with lower utilization in Medicare Advantage.
